# Supplementary material for: Explaining empirical dynamic modelling using verbal, graphical and mathematical approaches
Source: PubMed Central journal article supplement (PMC11094587; doi:10.1002/ece3.10903), 2024-05-15
Supplement: ECE3-14-e10903-s003.pdf [file ECE3-14-e10903-s003.pdf]

## 632 **Appendix S1: further figures and calculations**

633 Appendix for

634 ‘Explaining empirical dynamic modelling using verbal, graphical and mathematical approaches’

635 by Andrew M. Edwards, Luke A. Rogers, and Carrie A. Holt. *Ecology and Evolution*. DOI:  
636 10.1002/ece3.10903

637 This Appendix first contains the following animations, each of which is controllable by the  
638 user (pause, skip forward and back, etc.):

- 639 • Figure A.1: Animated version of Figure 1, with one frame for each value of time  $t$ .
- 640 • Figure A.2: Animated annotated version of Figure 2 for the focal time  $t^* = 39$ , graphically  
641 explaining the main steps of the simplex algorithm.
- 642 • Figure A.3: Animation showing Figure 2 but with each frame corresponding to a value of  
643 the focal time  $t^* = 2, 3, 4, \dots, 99$ .

644 Note that animation controls may not work in all pdf readers (Adobe Acrobat Reader is fine).  
645 Figure A.1 is also presented in Supplementary Movie S1 as a short narrated version.

646 Then follows the mathematical description of the simplex algorithm for multivariate time  
647 series, expanding on the description in the main text for univariate time series. We then describe  
648 the S-map algorithm.

Figure A.1: Animated version of Figure 1, controllable using the buttons (should start automatically; pause then click < or > to manually go through at own pace). A narrated version is given in Movie S1.

Figure A.2: Animated annotated version of the individual steps of Figure 2.

Figure A.3: Animated version of Figure 2 for each valid value of  $t^*$ . Good predictions of  $Y_{t^*+1}$  involve the blue asterisk lying within (or close to) the green open circle; red open circle shows the rEDM prediction. Interesting values that help understanding of EDM are:  $t^* = 2, 10, 14, 38$  (poor prediction of the subsequent large  $Y_{t^*+1}$ , though  $t^* = 42$  predicts its large  $Y_{t^*+1}$  well);  $t^* = 3, 11, 15, 43$  (from the top ‘arm’ the predictions are generally good);  $t^* = 4, 12, 16, 44$  (from the bottom-right ‘arm’ the predictions are generally good);  $t^* = 5, 13, 17, 45$  (from the left ‘arm’ the predictions are generally good though  $t^* = 13$ , the leftmost point, is not great);  $t^* = 47, 70$  (two of the nearest neighbours go in completely opposite directions);  $t^* = 34, 46, 64, 88$  (one or two nearest neighbours gives high  $Y_t$ , erroneously giving a large prediction);  $t^* = 75, 94$  (discrepancy with rEDM calculation, see main text);  $t^* = 10, 80$  (all neighbours move somewhat close by but the true  $Y_{t^*+1}$  jumps more). This animation helps understand how certain dynamics (large negative  $Y_t$ ) are much better predicted than others (large positive  $Y_t$ ); depending on the application this asymmetry may be important to consider. The understanding of the predictions of the ‘arms’ gives intuition as to how adding more lags (higher  $E$ ) can help predictions.

Table A.1: The main extra notation for the multivariate simplex and the S-map algorithms.

| <b>Notation</b>             | <b>Definition</b>                                                                                                                     |
|-----------------------------|---------------------------------------------------------------------------------------------------------------------------------------|
| <b>Indices</b>              |                                                                                                                                       |
| $k$                         | Index for variables; $k = 1, 2, 3, \dots, K$                                                                                          |
| $K$                         | Number of variables                                                                                                                   |
| <b>Variables</b>            |                                                                                                                                       |
| $N_{t,k}$                   | Time $t$ value of variable $k$                                                                                                        |
| $Y_{t,k}$                   | First-differenced and standardised value of variable $k$ at time $t$                                                                  |
| $\mathbf{N}$                | Matrix of data with elements $N_{t,k}$                                                                                                |
| $\mathbf{Z}$                | Intermediate matrix of first-differenced values, $Z_{t,k} = N_{t+1,k} - N_{t,k}$                                                      |
| $\mathbf{Y}$                | Matrix of first-differenced and standardised values with elements $Y_{t,k}$ defined in (A.3)                                          |
| <b>Simplex calculations</b> |                                                                                                                                       |
| $\tilde{\mathbf{x}}_t$      | Vector <i>defining</i> the axes of the lagged state space, for example<br>$\tilde{\mathbf{x}}_t = (Y_{t,1}, Y_{t-1,1}, Y_{t,2})$      |
| $m$                         | Maximum lag of all variables used in $\tilde{\mathbf{x}}_t$                                                                           |
| $C'_{m,t^*}$                | For a given $m$ and $t^*$ , the number of vectors $\mathbf{x}_t$ in the library of candidate nearest neighbours of $\mathbf{x}_{t^*}$ |
| <b>S-map calculations</b>   |                                                                                                                                       |
| $\theta$                    | Degree of local weighting used for the S-map algorithm.                                                                               |

## 649 Mathematical explanation for multivariate time series

650 Now consider  $K$  time series of variables to be analysed together (extra notation used here is sum-  
651 marised in Table A.1). Simple examples would be time series of prey and predator populations,  
652 or a population and a temperature index, or a single species in different spatial locations. The  
653 appeal of EDM is that explicit mathematical relationships between, say, temperature and a pop-  
654 ulation do not need to be prescribed from the choice of many plausible relationships. We denote

655  $N_{t,k}$  as the element at time  $t$  of time series  $k$ , giving the matrix

$$\mathbf{N} = \begin{bmatrix} N_{1,1} & N_{1,2} & \cdots & N_{1,K} \\ N_{2,1} & N_{2,2} & & \\ \vdots & & \ddots & \\ N_{T,1} & & & N_{T,K} \end{bmatrix}, \quad (\text{A.1})$$

656 such that each column represents the known time series of variable  $k$ . We designate the first  
 657 column, for which  $k = 1$ , to be the main variable of interest (such as an animal population)  
 658 that we wish to forecast based on the influence of the other variables (such as air or sea surface  
 659 temperature); thus the aim is to forecast  $\hat{N}_{T+1,1}$ .

660 For the univariate time series we used the first-differences of values. For multivariate time  
 661 series there is also a need to then standardise the values such that each variable is on a similar  
 662 scale (Chang *et al.*, 2017). For brevity we include this in the calculation of  $\mathbf{Y}$ , with the first-  
 663 differencing calculated as

$$Z_{t,k} = N_{t+1,k} - N_{t,k} \quad (\text{A.2})$$

664 for  $t = 1, 2, \dots, T - 1$ , and the standardising (centering and scaling) by subtracting each first-  
 665 differenced variable by its mean,  $\mu_k$ , and dividing by its standard deviation,  $\sigma_k$ :

$$Y_{t,k} = \frac{Z_{t,k} - \mu_k}{\sigma_k}, \quad (\text{A.3})$$

666 where

$$\mu_k = \frac{1}{T-1} \sum_{i=1}^{T-1} Z_{i,k}, \quad (\text{A.4})$$

$$\sigma_k^2 = \frac{1}{T-2} \sum_{i=1}^{T-1} (Z_{i,k} - \mu_k)^2. \quad (\text{A.5})$$

667 This defines

$$\mathbf{Y} = \begin{bmatrix} Y_{1,1} & Y_{1,2} & \cdots & Y_{1,K} \\ Y_{2,1} & Y_{2,2} & & \\ \vdots & & \ddots & \\ Y_{T-1,1} & & & Y_{T-1,K} \end{bmatrix}. \quad (\text{A.6})$$

668 Note that it is important to first-difference and then standardise (not vice versa).

669 We now generalise the steps (i)-(ix) that were described for the univariate case in Table 3 and  
670 associated text.

671 (i) For a given number of variables  $K$  and embedding dimension  $E > K$ , there is now a choice  
672 of axes that can be used to construct the state space. For example, with  $K = 2$  and  $E = 3$  there  
673 are two possible definitions of the components of  $\tilde{\mathbf{x}}_t$ :

$$\tilde{\mathbf{x}}_t = \begin{bmatrix} Y_{t,1} \\ Y_{t-1,1} \\ Y_{t,2} \end{bmatrix} \quad \text{or} \quad \tilde{\mathbf{x}}_t = \begin{bmatrix} Y_{t,1} \\ Y_{t,2} \\ Y_{t-1,2} \end{bmatrix}. \quad (\text{A.7})$$

674 Both definitions necessarily contain the unlagged variables  $Y_{t,1}$  and  $Y_{t,2}$ , because we need to know  
675 where the system is at time  $t$ , while the first definition contains the first variable with a lag of 1  
676 (i.e.  $Y_{t-1,1}$ ) and the second contains the second variable with a lag of 1 (i.e.  $Y_{t-1,2}$ ).

677 Similarly, with  $E = 4$  the choices for  $\tilde{\mathbf{x}}_t$  are

$$\begin{bmatrix} Y_{t,1} \\ Y_{t-1,1} \\ Y_{t-2,1} \\ Y_{t,2} \end{bmatrix}, \begin{bmatrix} Y_{t,1} \\ Y_{t-1,1} \\ Y_{t,2} \\ Y_{t-1,2} \end{bmatrix}, \begin{bmatrix} Y_{t,1} \\ Y_{t,2} \\ Y_{t-1,2} \\ Y_{t-2,2} \end{bmatrix}. \quad (\text{A.8})$$

678

With  $K = 4$  variables and  $E = 6$ , there are 10 options in all for  $\tilde{\mathbf{x}}_t$ :

$$\begin{aligned}
 & \begin{bmatrix} Y_{t,1} \\ Y_{t-1,1} \\ Y_{t-2,1} \\ Y_{t,2} \\ Y_{t,3} \\ Y_{t,4} \end{bmatrix}, \begin{bmatrix} Y_{t,1} \\ Y_{t-1,1} \\ Y_{t,2} \\ Y_{t-1,2} \\ Y_{t,3} \\ Y_{t,4} \end{bmatrix}, \begin{bmatrix} Y_{t,1} \\ Y_{t-1,1} \\ Y_{t,2} \\ Y_{t,3} \\ Y_{t-1,3} \\ Y_{t,4} \end{bmatrix}, \begin{bmatrix} Y_{t,1} \\ Y_{t-1,1} \\ Y_{t,2} \\ Y_{t,3} \\ Y_{t,4} \\ Y_{t-1,4} \end{bmatrix}, \begin{bmatrix} Y_{t,1} \\ Y_{t,2} \\ Y_{t-1,2} \\ Y_{t-2,2} \\ Y_{t,3} \\ Y_{t,4} \end{bmatrix}, \begin{bmatrix} Y_{t,1} \\ Y_{t,2} \\ Y_{t-1,2} \\ Y_{t,3} \\ Y_{t-1,3} \\ Y_{t,4} \end{bmatrix}, \begin{bmatrix} Y_{t,1} \\ Y_{t,2} \\ Y_{t-1,2} \\ Y_{t,3} \\ Y_{t,4} \\ Y_{t-1,4} \end{bmatrix}, \begin{bmatrix} Y_{t,1} \\ Y_{t,2} \\ Y_{t,3} \\ Y_{t-1,3} \\ Y_{t-2,3} \\ Y_{t,4} \end{bmatrix}, \begin{bmatrix} Y_{t,1} \\ Y_{t,2} \\ Y_{t,3} \\ Y_{t-1,3} \\ Y_{t,4} \\ Y_{t-1,4} \end{bmatrix}, \begin{bmatrix} Y_{t,1} \\ Y_{t,2} \\ Y_{t,3} \\ Y_{t-1,3} \\ Y_{t,4} \\ Y_{t-2,4} \end{bmatrix} \quad (\text{A.9})
 \end{aligned}$$

679

So the various choices of  $\tilde{\mathbf{x}}_t$  define the various state spaces. In practice the analyst will still need to make some up-front decisions so as to not have to explore too many choice of  $\tilde{\mathbf{x}}_t$ . All sensible combinations could be tested, and the one with maximum  $\rho$  used for forecasting.

680

681

682

683

684

685

686

(ii) Pick a focal time  $t^*$  for which we know  $\mathbf{x}_{t^*}$  and a library of similar vectors. Estimating  $\hat{\mathbf{x}}_{t^*+1}$  will give us our estimate of  $Y_{t^*+1,k}$  for each  $k$ . We may not be interested in all components (we do not wish to predict next year's temperature using a salmon population model), but the values may still help in testing how well the state-space reconstruction can estimate known values.

687

688

689

690

691

(iii) Define the library of candidate nearest neighbours of  $\mathbf{x}_{t^*}$ . It is not feasible to write out the library, analogous to (7), for general  $K, E, t^*$  and choice of state-space axes (the components of  $\tilde{\mathbf{x}}_t$ ). So here we derive  $\mathbf{X}$  for the earlier  $K = 4$  and  $E = 6$  example, and use this to understand and derive the library size for the general case. Specifically we use the second choice of  $\tilde{\mathbf{x}}_t$  from (A.9), namely all four variables at time  $t$  and lags of 1 for the first two variables, as shown in the



692 column headings here, to give:

$$\mathbf{X} = \begin{bmatrix} \cancel{\mathbf{x}_1} \\ \mathbf{x}_2 \\ \mathbf{x}_3 \\ \mathbf{x}_4 \\ \mathbf{x}_5 \\ \mathbf{x}_{E=6} \\ \vdots \\ \mathbf{x}_{t^*-1} \\ \cancel{\mathbf{x}_{t^*}} \\ \cancel{\mathbf{x}_{t^*+1}} \\ \cancel{\mathbf{x}_{t^*+2}} \\ \mathbf{x}_{t^*+3} \\ \vdots \\ \mathbf{x}_{T-4} \\ \mathbf{x}_{T-3} \\ \mathbf{x}_{T-2} \\ \cancel{\mathbf{x}_{T-1}} \\ \cancel{\mathbf{x}_T} \end{bmatrix} = \begin{bmatrix} Y_{t,1} & Y_{t-1,1} & Y_{t,2} & Y_{t-1,2} & Y_{t,3} & Y_{t,4} \\ Y_{1,1} & \times & Y_{1,2} & \times & Y_{1,3} & Y_{1,4} \\ Y_{2,1} & Y_{1,1} & Y_{2,2} & Y_{1,2} & Y_{2,3} & Y_{2,4} \\ Y_{3,1} & Y_{2,1} & Y_{3,2} & Y_{2,2} & Y_{3,3} & Y_{3,4} \\ Y_{4,1} & Y_{3,1} & Y_{4,2} & Y_{3,2} & Y_{4,3} & Y_{4,4} \\ Y_{5,1} & Y_{4,1} & Y_{5,2} & Y_{4,2} & Y_{5,3} & Y_{5,4} \\ Y_{6,1} & Y_{5,1} & Y_{6,2} & Y_{5,2} & Y_{6,3} & Y_{6,4} \\ \vdots & \vdots & \vdots & \vdots & \vdots & \vdots \\ Y_{t^*-1,1} & Y_{t^*-2,1} & Y_{t^*-1,2} & Y_{t^*-2,2} & Y_{t^*-1,3} & Y_{t^*-1,4} \\ Y_{t^*} & Y_{t^*-1,1} & Y_{t^*,2} & Y_{t^*-1,2} & Y_{t^*,3} & Y_{t^*,4} \\ \cancel{Y_{t^*+1,1}} & Y_{t^*,1} & \cancel{Y_{t^*+1,2}} & Y_{t^*,2} & \cancel{Y_{t^*+1,3}} & \cancel{Y_{t^*+1,4}} \\ Y_{t^*+2,1} & \cancel{Y_{t^*+1,1}} & Y_{t^*+2,2} & \cancel{Y_{t^*+1,2}} & Y_{t^*+2,3} & Y_{t^*+2,4} \\ Y_{t^*+3,1} & Y_{t^*+2,1} & Y_{t^*+3,2} & Y_{t^*+2,2} & Y_{t^*+3,3} & Y_{t^*+3,4} \\ \vdots & \vdots & \vdots & \vdots & \vdots & \vdots \\ Y_{T-4,1} & Y_{T-5,1} & Y_{T-4,2} & Y_{T-5,2} & Y_{T-4,3} & Y_{T-4,4} \\ Y_{T-3,1} & Y_{T-4,1} & Y_{T-3,2} & Y_{T-4,2} & Y_{T-3,3} & Y_{T-3,4} \\ Y_{T-2,1} & Y_{T-3,1} & Y_{T-2,2} & Y_{T-3,2} & Y_{T-2,3} & Y_{T-2,4} \\ Y_{T-1,1} & Y_{T-2,1} & Y_{T-1,2} & Y_{T-2,2} & Y_{T-1,3} & Y_{T-1,4} \\ \times & Y_{T-1,1} & \times & Y_{T-1,2} & \times & \times \end{bmatrix}. \quad (\text{A.10})$$

693 As for the univariate case, the four conditions for excluding components from the library of  
 694 candidate nearest neighbours are:

695 (a)  $\mathbf{x}_{t^*}$  cannot be a nearest neighbour to itself – excludes  $\mathbf{x}_{t^*}$ ;

696 (b) some  $\mathbf{x}_t$  are not fully defined (contain  $\times$ ) – excludes  $\mathbf{x}_1$  and  $\mathbf{x}_T$  (note that this removes far  
 697 less rows than for the univariate case);

698 (c) exclude any  $t$  for which we do not know  $\mathbf{x}_{t+1}$  – excludes  $\mathbf{x}_{T-1}$ ;

699 (d) it may not be appropriate to use any  $\mathbf{x}_t$  that includes any  $Y_{t^*+1,k}$ , since we are trying  
700 to predict  $Y_{t^*+1,1}$  and should not have knowledge of the covariates  $Y_{t^*+1,2}, Y_{t^*+1,3}$ , and  $Y_{t^*+1,4}$  –  
701 excludes  $\mathbf{x}_{t^*+1}$  and  $\mathbf{x}_{t^*+2}$  (note that this also removes far less rows than for the univariate case).

702 The resulting library of candidate nearest neighbours is:

$$\{\mathbf{x}_2, \mathbf{x}_3, \dots, \mathbf{x}_{t^*-1}, \mathbf{x}_{t^*+3}, \mathbf{x}_{t^*+4}, \dots, \mathbf{x}_{T-2}\}, \quad (\text{A.11})$$

703 which has size  $T - 6$  except for certain values of  $t^*$ .

704 Using a similar approach to the univariate case, we find that the the library size for the general  
705 multivariate case depends on the maximum lag,  $m$ , where  $m = 1$  for the example in (A.10), as:

$$C'_{m,t^*} = \begin{cases} T - 2(m + 2), & t^* = m + 1, m + 2, \dots, T - m - 3, \\ t^* - m - 1, & t^* = T - m - 2, T - m - 1, \dots, T - 2. \end{cases} \quad (\text{A.12})$$

706 Note that this does not depend on the number of variables,  $K$ , or the embedding dimension,  
707 only on the maximum lag  $m$ . This means that adding more variables (more information) to the  
708 analysis will not reduce the library size if the maximum lag stays the same. Furthermore, (A.12)  
709 is equivalent to replacing  $E$  with  $m + 1$  in (11), which is consistent with the univariate case for  
710 which  $E = m + 1$ . So a plot of  $C'_{m,t^*}$  is simply the same as Figure 4 with  $E$  replaced by  $m + 1$ .  
711 The pattern of invalid  $t^*$  values and the library size depends only on  $m$  and not on the overall  
712 embedding dimension.

713 The actual embedding dimension  $E$  depends on the exact combination of lagged variables  
714 used (the choices in (A.9) all have  $E = 6$  but either  $m = 1$  or  $m = 2$ ), and satisfies  $E \geq K + m$ .  
715 So although the embedding dimension will increase with extra variables (larger  $K$ ), the library  
716 size will remain the same. And for a given embedding dimension  $E$ , the library is always larger  
717 for the multivariate case than for the univariate case (for which  $E = m + 1$ ), because the extra  
718 variables ‘use up’ some of the available embedding dimensions.

719 (iv)-(vii) These steps are the same as the univariate case, to rank the nearest neighbours to  $\mathbf{x}_{t^*}$ .

720 This is because once  $t^*$  and the library of valid vectors are defined, it does not matter whether  
721 the dimensions of the state space relate to multiple variables (multivariate case) or to just lagged  
722 values of one variable (univariate case), the calculations are the same. For (vi) the equivalent  
723 weighting is done for each  $\hat{Y}_{t^*+1,k}$  (each  $k$ ) that we want to predict (just  $k = 1$  for a single popula-  
724 tion and environmental covariates, or multiple  $k$  if the variables represent multiple populations).

725 (viii) The calculation of  $\rho$  is the same as in (15) with  $Y_{t^*+1}$  replaced by  $Y_{t^*+1,k}$  and  $\hat{Y}_{t^*+1}$   
726 replaced by  $\hat{Y}_{t^*+1,k}$ .

727 (ix) Repeating steps (i)-(viii) can be done for sensible definitions of  $\tilde{\mathbf{x}}_t$  (not simply just differ-  
728 ent  $E$ , as for the univariate case). The highest correlation coefficient would then give the choice  
729 of  $\tilde{\mathbf{x}}_t$  to use for forecasting  $\hat{N}_{T+1,1}$ .

## 730 S-map algorithm

731 Sugihara (1994) introduced the ‘sequential locally weighted global linear map’, or S-map for  
732 short. This has since been used by first obtaining the optimal embedding dimension  $E$  using the  
733 simplex algorithm, and then making predictions based on all the points in the state space, rather  
734 than just the  $E + 1$  nearest neighbours (e.g. Hsieh *et al.* 2005; Deyle *et al.* 2022). The same  
735 library of candidate nearest neighbours for the simplex algorithm becomes a library of all valid  
736 neighbours, again given by (7) with size  $C_{E,t^*}$  given by (11). Predictions are done by a weighting  
737 approach similar to (13) and (14) for the simplex algorithm, where  $\theta$  represents the degree of  
738 local weighting, and the weights  $u_i$  are

$$u_i = \exp\left(-\frac{\theta \|\mathbf{x}_{t^*} - \mathbf{x}_{\psi_i}\|}{\bar{d}}\right), \quad (\text{A.13})$$

739 where  $\bar{d}$  is the mean distance of all the points in the library from the focal point:

$$\bar{d} = \frac{1}{C_{E,t^*}} \sum_{k=1}^{C_{E,t^*}} \|\mathbf{x}_{t^*} - \mathbf{x}_{\psi_k}\|. \quad (\text{A.14})$$

740 A larger value of  $\theta$  weights the closest points to  $\mathbf{x}_{t^*}$  relatively more than the further points, such  
741 that predictions depend more strongly on the local region around  $\mathbf{x}_{t^*}$ . The extreme of  $\theta = 0$  means  
742 that all weights are  $u_i = 1$  and predictions are simply the global mean of the predicted values of  
743 the valid neighbours. This is a linear calculation, hence  $\theta = 0$  represents a linear prediction, and  
744 increasing  $\theta$  represents increasing nonlinearity (Hsieh *et al.*, 2005). The value of  $\theta$  that yields  
745 the maximum of the correlation coefficient ( $\rho$ ) is calculated and used for forecasting. To solve  
746 for the predictions requires use of singular value decomposition calculations (Hsieh *et al.*, 2005;  
747 Deyle *et al.*, 2022).

748 For our simulated data set with  $E = 3$  (the optimal  $E$  from the simplex calculations) we get  
749  $\theta = 2.7$  for which  $\rho = 0.87$ , slightly higher than the  $\rho = 0.83$  obtained for the simplex algorithm.  
750 For forecasting, we estimate  $\hat{Y}_{100} = 0.480$ , giving  $\hat{N}_{101} = 0.480 + 0.060 = 0.541$  (rounded up).  
751 Thus, we avoid a negative forecast of the population (unlike for the simplex algorithm). However,  
752 for our full time series we do still obtain three negative predictions using S-map. Again, there is  
753 no guarantee that high correlation based on unlagged  $\hat{Y}_t$  values also yields high correlation based  
754 on the  $\hat{N}_t$  variables of interest.

755 The allowable values of  $t^*$  and consequent library of neighbours are the same as for the  
756 simplex algorithm, so the descriptions of aspects 1 and 2 occur for S-map. We find that the rEDM  
757 implementation of the S-map algorithm again differs slightly from ours, based on the default  
758 candidate neighbours to exclude. With  $E = 3$ , the optimal  $\theta = 2.7$ , and focal time  $t^* = 93$ , we  
759 estimate  $\hat{Y}_{94} = 0.384$  using pbsEDM and 0.191 using rEDM (see the pbsSmap vignette in pbsEDM).  
760 However, by incorporating the values of  $Y_{92}$  to  $Y_{95}$  as dummy data for  $t = 100$  to 104, we can  
761 ‘fool’ the pbsEDM S-map algorithm to allow the values  $\mathbf{x}_{t^*+1}$ ,  $\mathbf{x}_{t^*+2}$ , and  $\mathbf{x}_{t^*+3}$  to be included  
762 in the library of neighbours (because they are no longer close in time to  $t^* = 93$ ). The pbsEDM  
763 S-map algorithm then estimates  $\hat{Y}_{94} = 0.194$ , which is very close to the rEDM estimate of 0.191  
764 (they are not expected to be identical because the extra dummy points also affect  $\bar{d}$ ).
